# Supplementary material for: Large vesicle extrusions from C. elegans neurons are consumed and stimulated by glial-like phagocytosis activity of the neighboring cell
Source: eLife journal article supplement (doi:10.7554/elife.82227), 2023-03-02
Supplement: supp [file elife-82227-supp-v1.zip]

Archive with 27 entries (27 files):
- elife_poa_e82227_Figure_1_figure_supplement_1.pdf
- elife_poa_e82227_Figure_5_figure_supplement_1.pdf
- elife_poa_e82227_Figure_6_figure_supplement_1.pdf
- elife_poa_e82227_Figure_6_figure_supplement_3.pdf
- elife_poa_e82227_Figure_6_figure_supplement_2.pdf
- elife_poa_e82227_Figure_6_figure_supplement_4.pdf
- elife_poa_e82227_Figure_8_figure_supplement_1.pdf
- elife_poa_e82227_Figure_8_figure_supplement_2.pdf
- elife_poa_e82227_Figure_1_source_data_1.docx
- elife_poa_e82227_Figure_2_source_data_1.docx
- elife_poa_e82227_Figure_3_source_data_1.docx
- elife_poa_e82227_Figure_4_source_data_1.docx
- elife_poa_e82227_Figure_5_source_data_1.docx
- elife_poa_e82227_Figure_5_figure_supplement_1_source_data_1.docx
- elife_poa_e82227_Figure_6_source_data_1.docx
- elife_poa_e82227_Figure_6_figure_supplement_1_source_data_1.docx
- elife_poa_e82227_Figure_6_figure_supplement_2_source_data_1.docx
- elife_poa_e82227_Figure_6_figure_supplement_3_source_data_1.docx
- elife_poa_e82227_Figure_6_figure_supplement_4_source_data_1.docx
- elife_poa_e82227_Figure_7_source_data_1.docx
- elife_poa_e82227_Figure_8_source_data_1.docx
- elife_poa_e82227_Figure_8_figure_supplement_2_source_data_1.docx
- elife_poa_e82227_Video_1.avi
- elife_poa_e82227_Video_2.avi
- elife_poa_e82227_Video_3.mov
- elife_poa_e82227_Video_4.mov
- elife_poa_e82227_Supplementary_file_1.docx
