# Supplementary material for: Large vesicle extrusions from C. elegans neurons are consumed and stimulated by glial-like phagocytosis activity of the neighboring cell
Source: eLife journal article supplement (doi:10.7554/elife.82227), 2023-03-02
Supplement: supp [file elife-82227-supp-v1.zip › elife_poa_e82227_Figure_6_figure_supplement_4_source_data_1.docx]

**Numerical data for Figure 6 - Figure supplement 4 –** *arf-6* mutants maintain early ALM budding

|  | *daf-2(e1370)* | *arf-6(tm1447);daf-2(e1370)* | CMH test |
| --- | --- | --- | --- |
| Bud events | 17 | 43 | P=0.0605 |
| Total observed neurons | 50 | 82 |  |
