# Supplementary figures and images for: Large vesicle extrusions from C. elegans neurons are consumed and stimulated by glial-like phagocytosis activity of the neighboring cell
Source: eLife journal article supplement (doi:10.7554/elife.82227), 2023-03-02

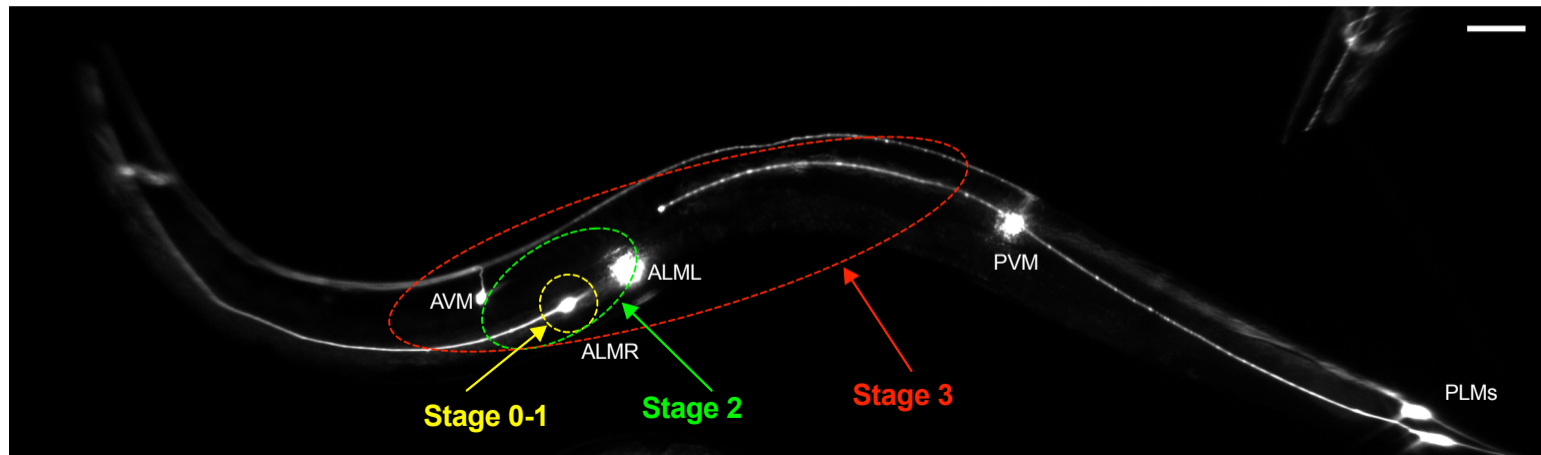

Supplement: supp [file elife-82227-supp-v1.zip › elife_poa_e82227_Figure_1_figure_supplement_1.pdf]

**A**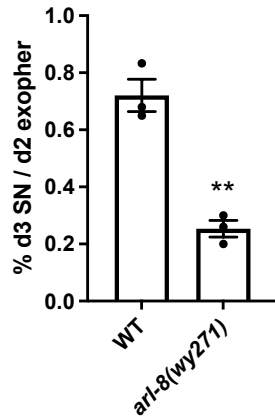**B**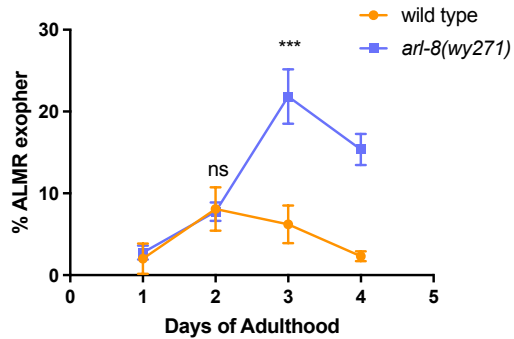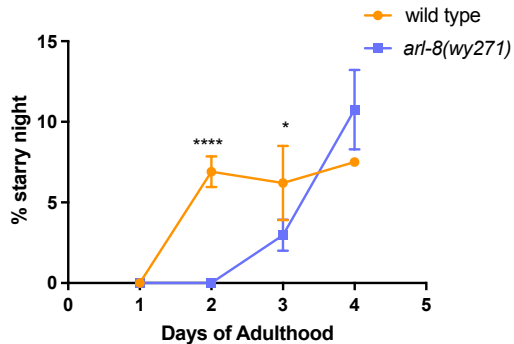

Supplement: supp [file elife-82227-supp-v1.zip › elife_poa_e82227_Figure_5_figure_supplement_1.pdf]

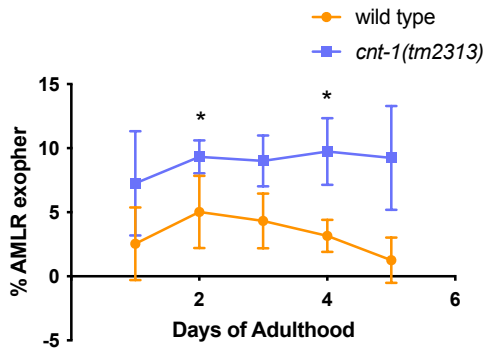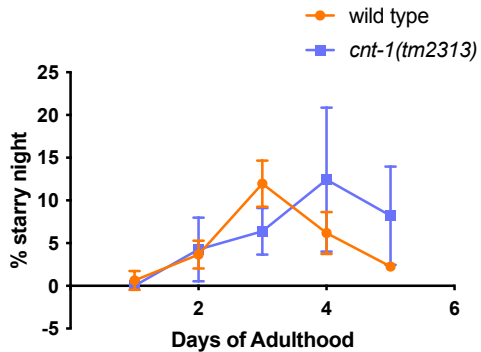

Supplement: supp [file elife-82227-supp-v1.zip › elife_poa_e82227_Figure_6_figure_supplement_1.pdf]

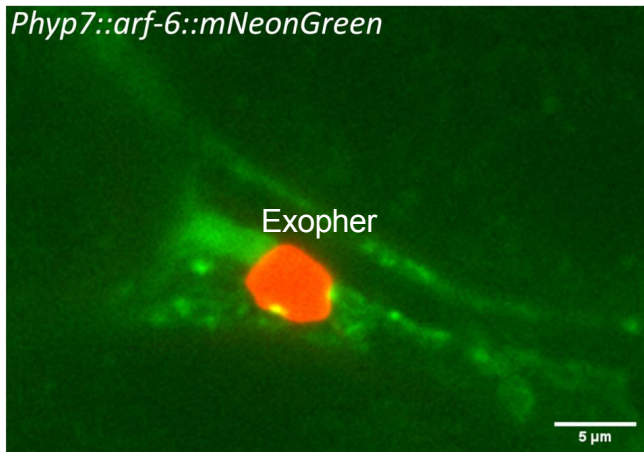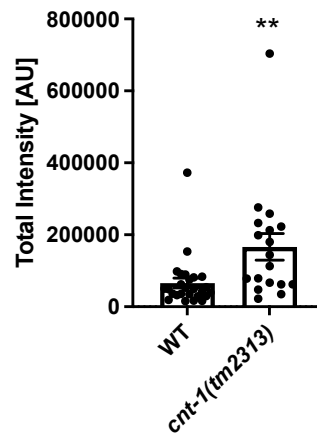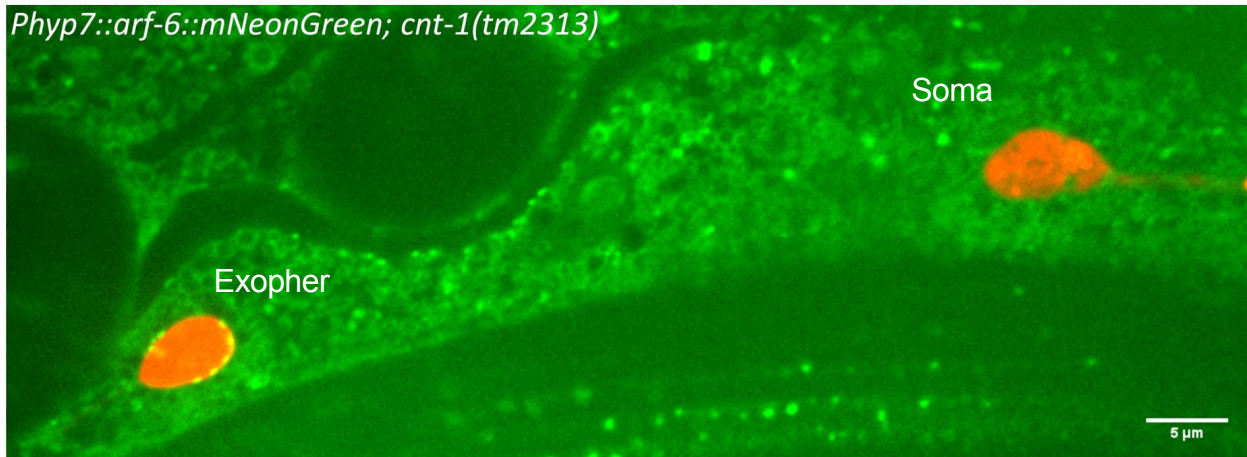

Supplement: supp [file elife-82227-supp-v1.zip › elife_poa_e82227_Figure_6_figure_supplement_3.pdf]

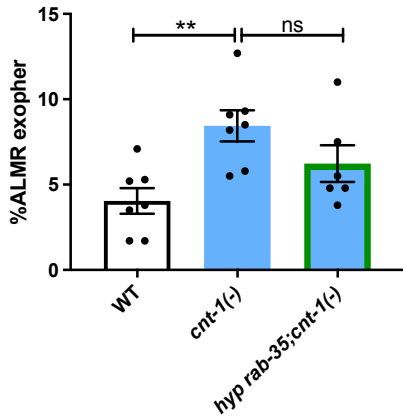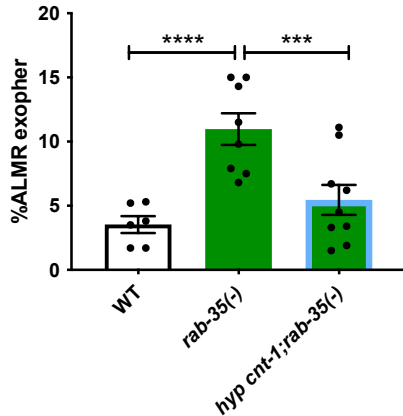

Supplement: supp [file elife-82227-supp-v1.zip › elife_poa_e82227_Figure_6_figure_supplement_2.pdf]

**A**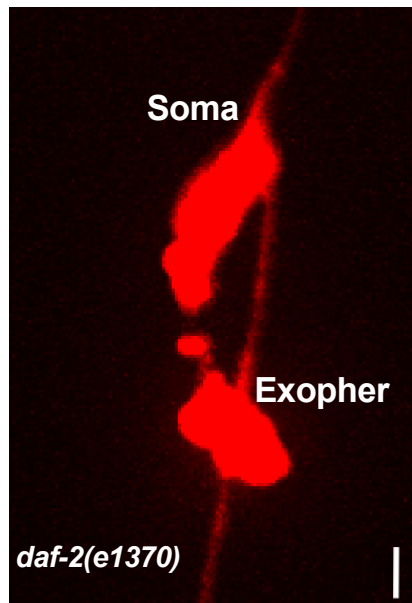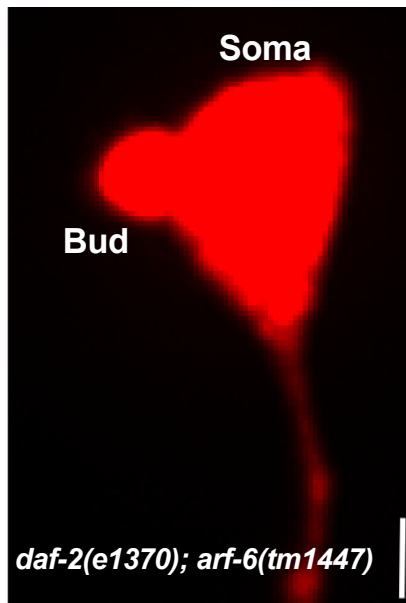**B**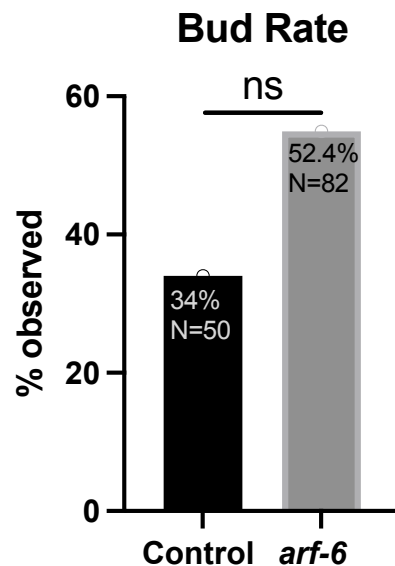

Supplement: supp [file elife-82227-supp-v1.zip › elife_poa_e82227_Figure_6_figure_supplement_4.pdf]

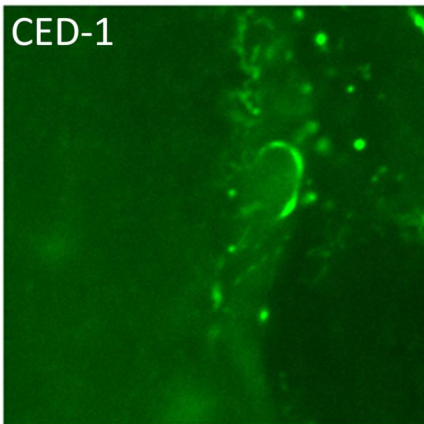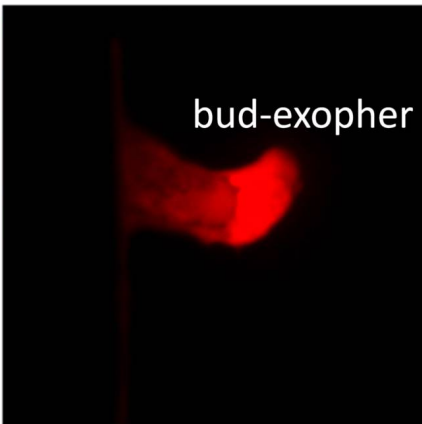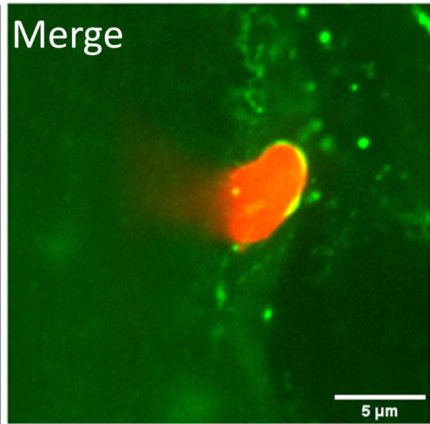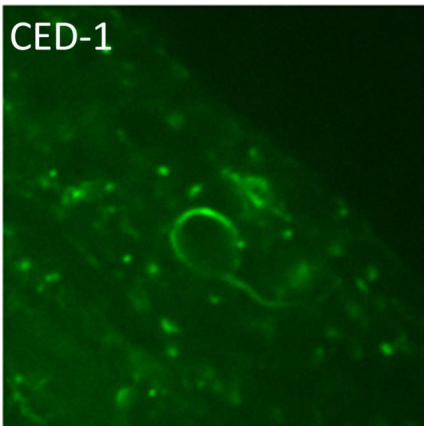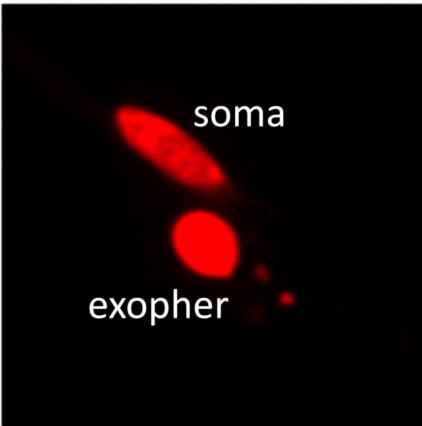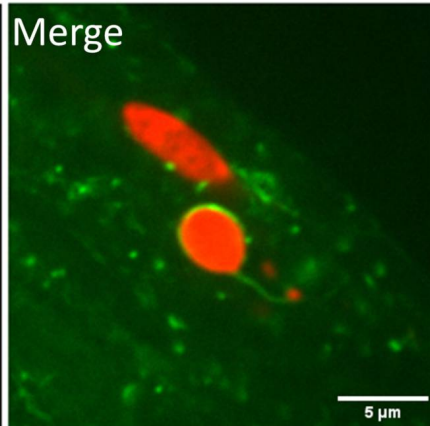

Supplement: supp [file elife-82227-supp-v1.zip › elife_poa_e82227_Figure_8_figure_supplement_1.pdf]

## Touch Sensitivity ARF-6

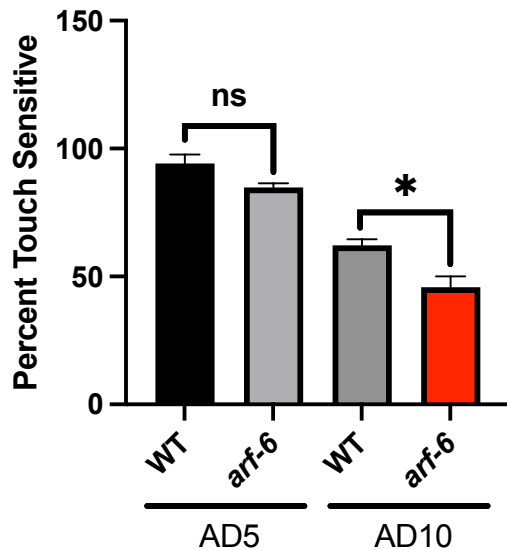

## Touch Sensitivity CED-1

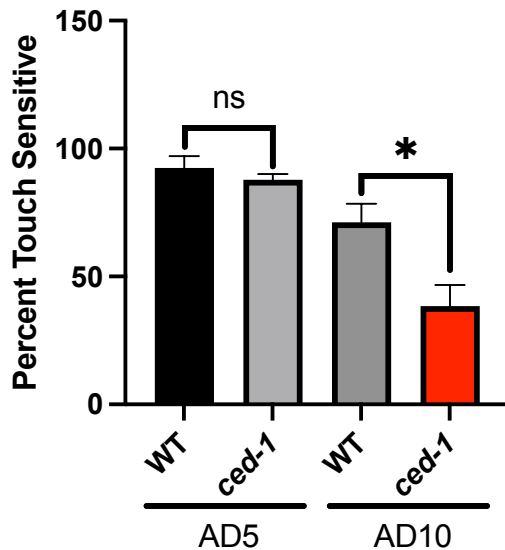

Supplement: supp [file elife-82227-supp-v1.zip › elife_poa_e82227_Figure_8_figure_supplement_2.pdf]
